# Supplementary material for: Accelerated co-precipitation of lead, zinc and copper by carbon dioxide bubbling in alkaline municipal solid waste incinerator (MSWI) fly ash wash water
Source: Royal Society of Chemistry journal article supplement (doi:10.1039/c5ra23889g), 2016-01-01
Supplement: c5ra23889g1.pdf [file c5ra23889g1.pdf]

## Supporting information

The partitioning of a trace element between a carbonate mineral and aqueous solution is generally expressed by the distribution coefficient,  $K_d$ , which is defined as

$$K_d = \left( \frac{X_{\text{TrCO}_3}}{X_{\text{MCO}_3}} \right) / \left( \frac{m_{\text{Tr}}}{m_{\text{M}}} \right) \quad (\text{A1})$$

McIntire (1963) calculated that,  $K_d$  is related to the quotient of the thermodynamic solubility products of major element carbonate ( $\text{MCO}_3$ ) and trace element carbonate ( $\text{TrCO}_3$ ) and  $K_d$  can be expressed:

$$K_d = \left( \frac{K_{\text{MCO}_3}}{K_{\text{TrCO}_3}} \right)^{\frac{1}{\nu_{\text{Tr}}}} \left( \frac{\gamma_{\text{Tr}}}{\gamma_{\text{M}}} \right) \left( \exp \left( \frac{-\Delta\mu}{\nu_a RT} \right) \right) \quad (\text{A2})$$

The amount of Ca and Tr precipitated per kilogram of water passing through the reactor is:

$$n_{\text{Ca}} = (m(\text{in})_{\text{Ca}}) - (m(\text{out})_{\text{Ca}}) (\text{1 kg}) \quad (\text{A3})$$

$$n_{\text{Tr}} = (m(\text{in})_{\text{Tr}}) - (m(\text{out})_{\text{Tr}}) (\text{1 kg}) \quad (\text{A4})$$

From the definition of mole fraction;

$$X_{\text{TrCO}_3} = \frac{n_{\text{TrCO}_3}}{n_{\text{TrCO}_3} + n_{\text{CaCO}_3}} \quad (\text{A5})$$

$$X_{\text{CaCO}_3} = \frac{n_{\text{CaCO}_3}}{n_{\text{TrCO}_3} + n_{\text{CaCO}_3}} \quad (\text{A6})$$

So, the Eq. A3, A4, A5 and A6 can be written as:

$$\frac{X_{\text{TrCO}_3}}{X_{\text{CaCO}_3}} = \frac{n_{\text{TrCO}_3}}{n_{\text{CaCO}_3}} = \frac{(m(\text{in})_{\text{Tr}} - m(\text{out})_{\text{Tr}})}{(m(\text{in})_{\text{Ca}} - m(\text{out})_{\text{Ca}})} \quad (\text{A7})$$

Also because, the effluent stream (out) is simply the contents of the reactor, and the concentration ratio of Tr to Ca in the reactor is;

$$\frac{m(\text{out})_{\text{Tr}}}{m(\text{out})_{\text{Ca}}}$$

This ratio and Eq. A7 can be substituted into the definition of  $K_d$  to give;

$$K_d = \left( \frac{X_{\text{TrCO}_3}}{X_{\text{CaCO}_3}} \right) / \left( \frac{m_{\text{Tr}}}{m_{\text{Ca}}} \right) = \left( \frac{m(\text{in})_{\text{Tr}} - m(\text{out})_{\text{Tr}}}{m(\text{in})_{\text{Ca}} - m(\text{out})_{\text{Ca}}} \right) / \left( \frac{m(\text{out})_{\text{Tr}}}{m(\text{out})_{\text{Ca}}} \right) \quad (\text{A8})$$

After measuring the  $m(\text{in})_{\text{Tr}}$ ,  $m(\text{in})_{\text{Ca}}$ ,  $m(\text{out})_{\text{Tr}}$ ,  $m(\text{out})_{\text{Ca}}$  and each sampling time, the  $K_d$  can be given. Eq. A8 can be rearranged to;

$$\left( \frac{m(\text{out})_{\text{Tr}}}{m(\text{in})_{\text{Tr}}} \right) = \frac{1}{K_d \left( \frac{m(\text{in})_{\text{Ca}}}{m(\text{out})_{\text{Ca}}} \right) - K_d + 1} \quad (\text{A9})$$

$f_i$  indicates the fraction of species  $i$  remaining in solution, as:

$$f_i = \frac{m(\text{out})_i}{m(\text{in})_i} \quad (\text{A10})$$

So, the Eq. A10 becomes:

$$f_{\text{Tr}} = \frac{1}{(K_d/f_{\text{Ca}}) - K_d + 1} \quad (\text{A11})$$

And  $F_i$  defines the fraction of species  $i$  precipitated from solution, as

$$F_i = 1 - f_i \quad (\text{A12})$$

So that, the Eq. A12 becomes:

$$f_{\text{Tr}} = \frac{1}{\left(\frac{K_d}{1 - F_{\text{Ca}}}\right) - K_d + 1} \quad (\text{A13})$$

This can be rearranged to:

$$f_{\text{Tr}} = \frac{1}{\left(\frac{K_d}{1 - F_{\text{Ca}}}\right) - K_d + 1} \quad (\text{A14})$$

|                         | Notation                                                                                                                                                                     |
|-------------------------|------------------------------------------------------------------------------------------------------------------------------------------------------------------------------|
| M                       | major element                                                                                                                                                                |
| Tr                      | trace element                                                                                                                                                                |
| $m_{\text{Ca}}$         | concentration of Ca element in aqueous solution, mol/kg                                                                                                                      |
| $m_{\text{Tr}}$         | concentration of a trace element in aqueous solution, mol/kg                                                                                                                 |
| $n_{\text{Ca}}$         | number of moles of Ca element                                                                                                                                                |
| $n_{\text{Tr}}$         | number of moles of the trace element                                                                                                                                         |
| R                       | the gas constant, 8.314 J/mol K                                                                                                                                              |
| T                       | temperature, K                                                                                                                                                               |
| $v_a$                   | ratio of the number of anions in $\text{Tr}_n\text{CO}_3$ to the number of anions in $\text{M}_m\text{CO}_3$                                                                 |
| $X_{\text{CaCO}_3}$     | mole fraction of calcite component in the solid solution                                                                                                                     |
| $X_{\text{TrCO}_3}$     | mole fraction of the trace element carbonate component in the solid solution                                                                                                 |
| $\Delta\mu$             | difference between the chemical potential of $\text{TrCO}_3$ in a pure crystal of $\text{TrCO}_3$ and its chemical potential as a solid solution component in $\text{MCO}_3$ |
| $\gamma$                | activity coefficient of element in aqueous solution                                                                                                                          |
| $\text{Fe}_w\text{-OH}$ | weak-sites of $\text{Fe}(\text{OH})_3$                                                                                                                                       |
| $\text{Fe}_s\text{-OH}$ | strong-sites of $\text{Fe}(\text{OH})_3$                                                                                                                                     |
| $\text{Al}_w\text{-OH}$ | weak-sites of $\text{Al}(\text{OH})_3$                                                                                                                                       |
| $\text{Al}_s\text{-OH}$ | strong-sites of $\text{Al}(\text{OH})_3$                                                                                                                                     |
